# Supplementary material
Source: PubMed Central journal article supplement (PMC11178315)
Supplement: NIHMS1942930-supplement-Figure_S1_Floorplan.pdf [file NIHMS1942930-supplement-Figure_S1_Floorplan.pdf]

**a**

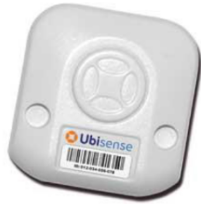

**b**

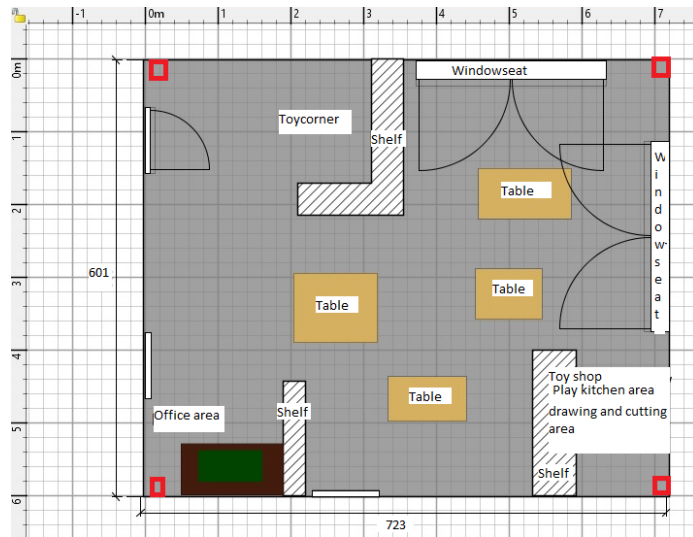

**Figure S1. Tracking system:** (a) Ubisense tag at approximate scale (1" x 1" x .36") which emits radio signals to (b) sensors arrayed in a classroom space (with dimensions 6.01 m x 7.23 m), where the four red squares in the corners represent the Ubisense radio receivers.
