# Supplementary material
Source: PubMed Central journal article supplement (PMC11178315)

Females

Males

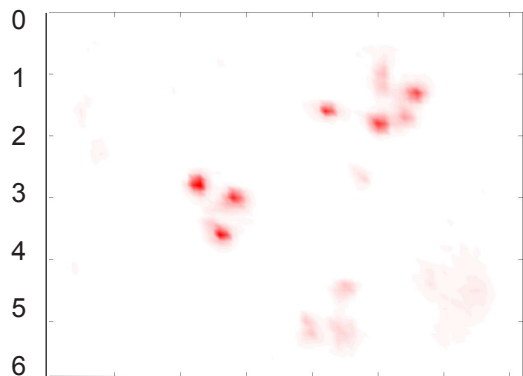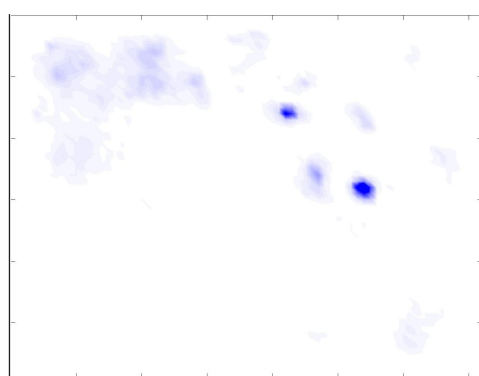

Day 1

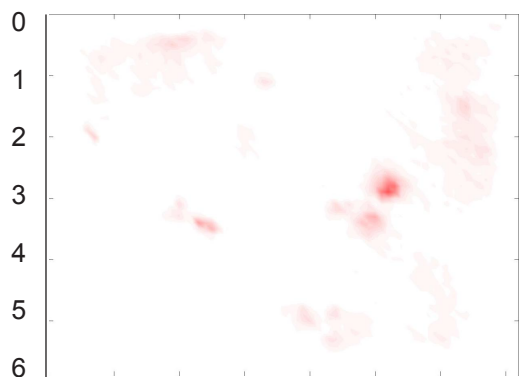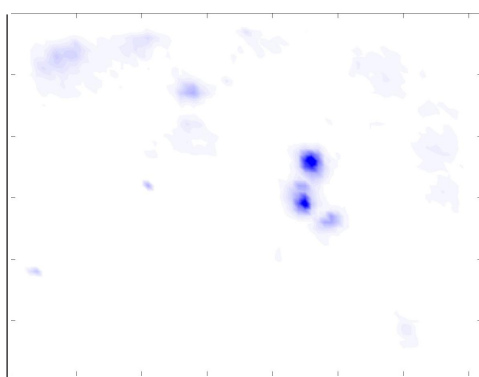

Day 2

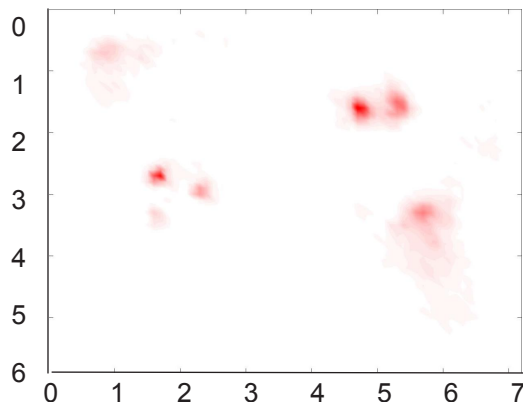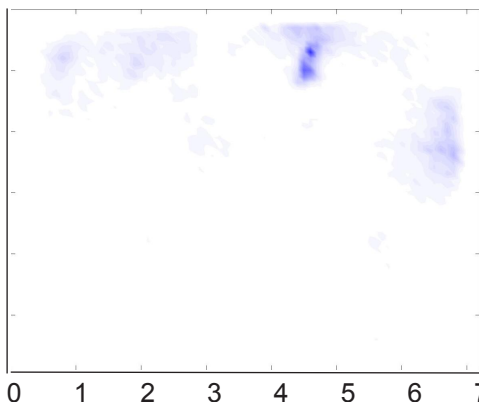

Day 3

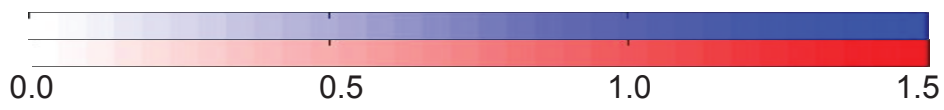

Supplement: NIHMS1942930-supplement-Figure_S2_Heatmaps_by_gender.pdf [file NIHMS1942930-supplement-Figure_S2_Heatmaps_by_gender.pdf]
